# Supplementary material
Source: PubMed Central journal article supplement (PMC4013509)

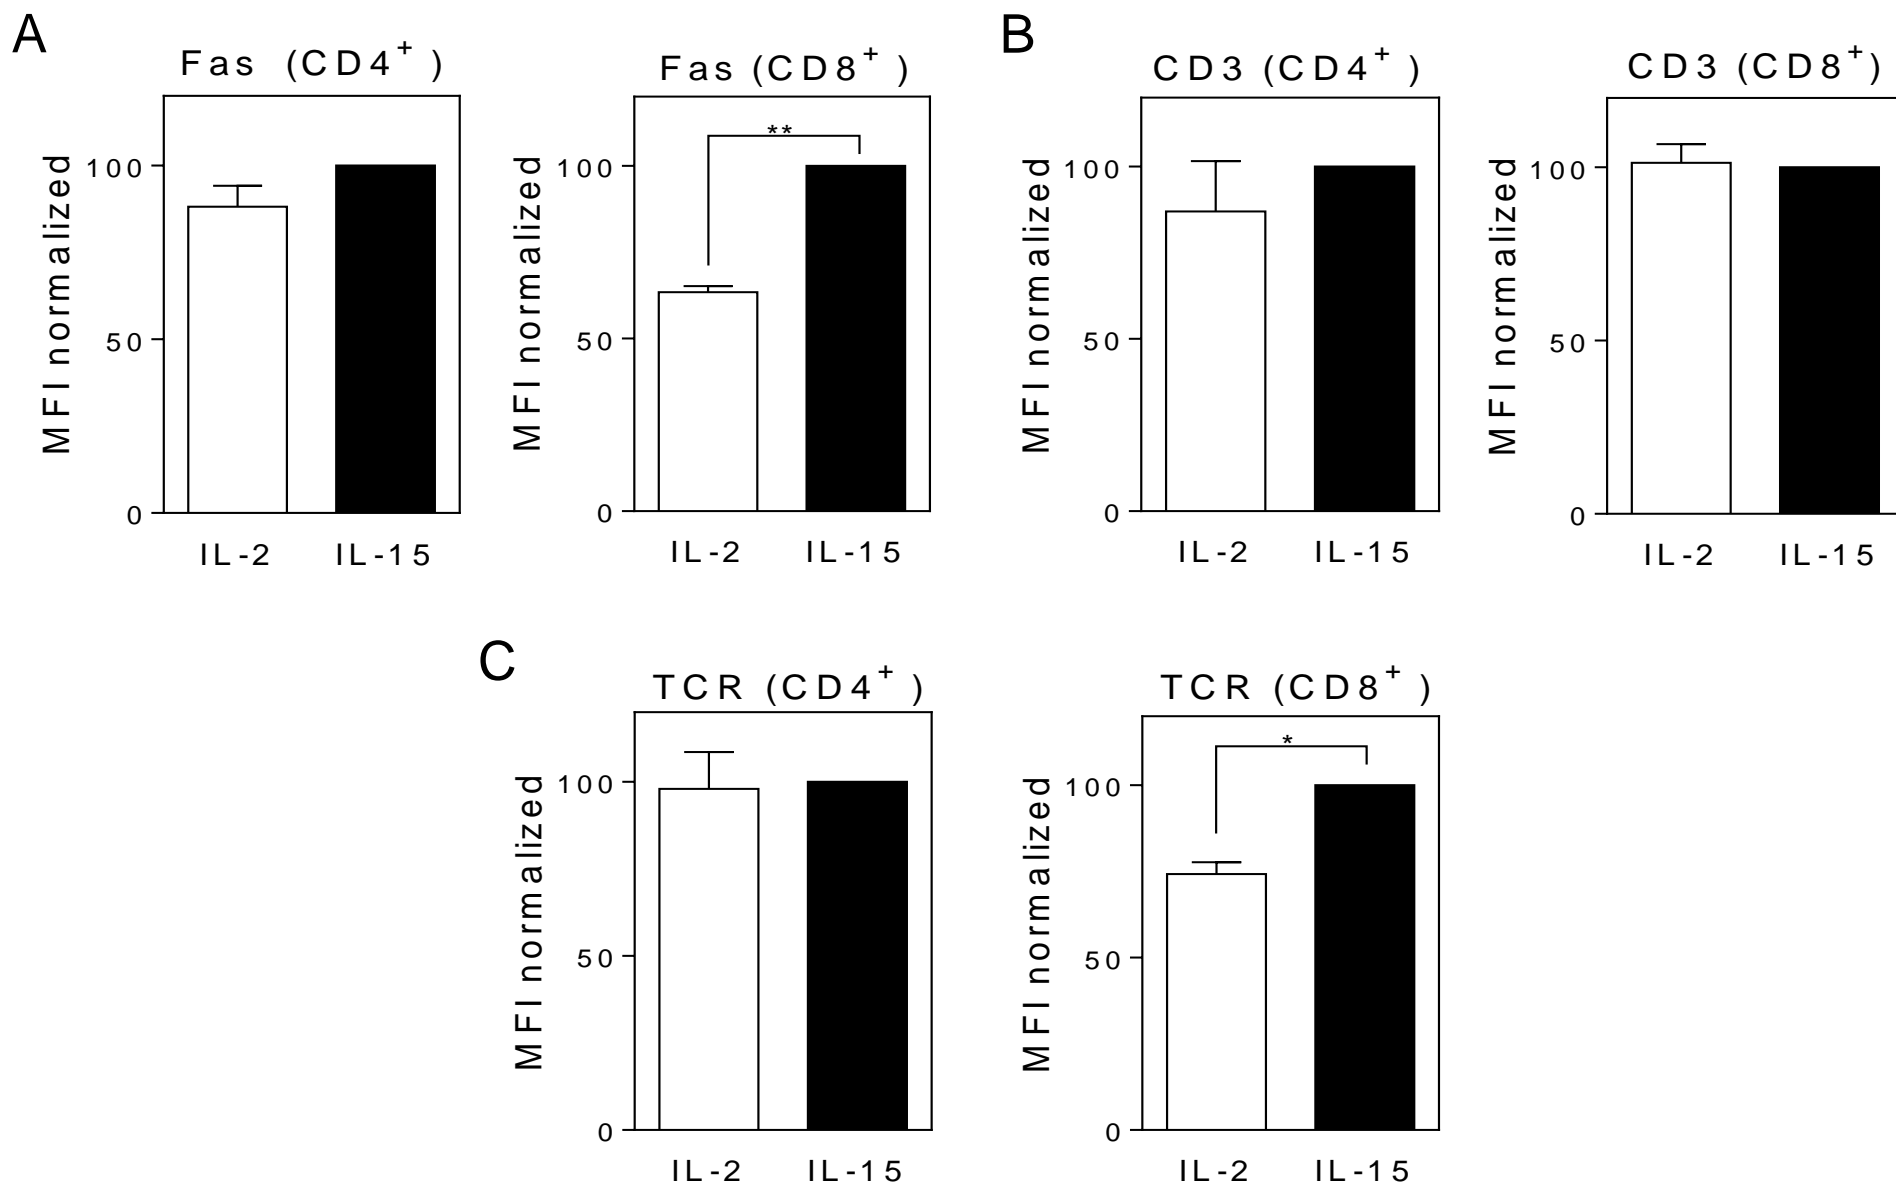

Figure S1

Supplement: cdd201410x1.pdf [file cdd201410x1.pdf]
